# Supplementary material for: The Addition of a Synthetic LPS-Targeting Domain Improves Serum Stability While Maintaining Antimicrobial, Antibiofilm, and Cell Stimulating Properties of an Antimicrobial Peptide
Source: PubMed Central journal article supplement (PMC7407491; doi:10.3390/biom10071014), 2020-07-08
Supplement: biomolecules-10-01014-s001.pdf [file biomolecules-10-01014-s001.pdf]

**Table S1.** The antibiogram of clinical isolates used in this study.

| Antibiotic                           | <i>Escherichia coli</i>     |                  | <i>Methicillin Resistant Staphylococcus aureus</i> |        | <i>Methicillin Resistant Staphylococcus pseudointermedius</i> |     |
|--------------------------------------|-----------------------------|------------------|----------------------------------------------------|--------|---------------------------------------------------------------|-----|
|                                      | Interpretation <sup>1</sup> | MIC <sup>2</sup> | Interpretation                                     | MIC    | Interpretation                                                | MIC |
| <b>Amikacin</b>                      | /                           | /                | S (18 mm)                                          | 9.5    | /                                                             | /   |
| <b>Amoxicillin-clavulanate</b>       | R (8 mm <sup>3</sup> )      | >64              | R (16 mm)                                          | 14     | R (24 mm)                                                     | 2.9 |
| <b>Ampicillin</b>                    | R (6 mm)                    | >46              | R (11 mm)                                          | 19     | R (13 mm)                                                     | 12  |
| <b>Carbenicillin</b>                 | /                           | /                | R (15 mm)                                          | N/A    | /                                                             | /   |
| <b>Cefixime</b>                      | /                           | /                | R (6 mm)                                           | >26    | /                                                             | /   |
| <b>Cefovecin</b>                     | R (6 mm)                    | N/A              | /                                                  | /      | R (21 mm)                                                     | N/A |
| <b>Cefoxitin</b>                     | R (6 mm)                    | >69              | /                                                  | /      | R (24 mm)                                                     | N/A |
| <b>Ceftazidime</b>                   | /                           | /                | R (13 mm)                                          | 41     | /                                                             | /   |
| <b>Ceftiofur</b>                     | /                           | /                | R (19 mm)                                          | 3.9    | /                                                             | /   |
| <b>Cephalothin</b>                   | R (6 mm)                    | >101             | R (25 mm)                                          | 2.2    | R (27 mm)                                                     | 1.4 |
| <b>Chloramphenicol</b>               | /                           | /                | S (26 mm)                                          | 4.5    | /                                                             | /   |
| <b>Clindamycin</b>                   | /                           | /                | R (6 mm)                                           | >10    | R (7 mm)                                                      | >10 |
| <b>Difloxacin</b>                    | /                           | /                | S (30 mm)                                          | ≤0.07  | /                                                             | /   |
| <b>Enrofloxacin</b>                  | R (7 mm)                    | >18              | S (29 mm)                                          | ≤0.099 | R (6 mm)                                                      | >19 |
| <b>Gentamicin</b>                    | S (18 mm)                   | 2.6              | R (9 mm)                                           | 31     | I (14 mm)                                                     | 7.9 |
| <b>Imipenem</b>                      | /                           | /                | R (39 mm)                                          | ≤0.56  | /                                                             | /   |
| <b>Marbofloxacin</b>                 | R (6 mm)                    | N/A              | S (27 mm)                                          | N/A    | R (6 mm)                                                      | N/A |
| <b>Orbifloxacin</b>                  | R (6 mm)                    | >40              | S (27 mm)                                          | 0.25   | R (6 mm)                                                      | >40 |
| <b>Oxacillin</b>                     | /                           | /                | R (6 mm)                                           | N/A    | R (14 mm)                                                     | 1.8 |
| <b>Piperacillin</b>                  | /                           | /                | R (12 mm)                                          | N/A    | /                                                             | /   |
| <b>Polymixin-B</b>                   | /                           | /                | R (9 mm)                                           | /      | /                                                             | /   |
| <b>Tetracycline</b>                  | R (13 mm)                   | 16               | S (31 mm)                                          | 0.42   | R (8 mm)                                                      | >33 |
| <b>Ticarcillin</b>                   | /                           | /                | R (14 mm)                                          | N/A    | /                                                             | /   |
| <b>Titracillin-clavulanate</b>       | /                           | /                | R (15 mm)                                          | N/A    | /                                                             | /   |
| <b>Trimethoprim-sulfamethoxazole</b> | R (6 mm)                    | >10              | S (31 mm)                                          | ≤4.1   | R (6 mm)                                                      | >10 |

<sup>1</sup> Where R represents “resistant”, I represents “intermediate” and S represents “sensitive”.

<sup>2</sup> MIC represents the minimal inhibitory concentration of the antibiotic in mcg/mL.

<sup>3</sup> mm represents the diameter zone of inhibition against antibiotic disc.

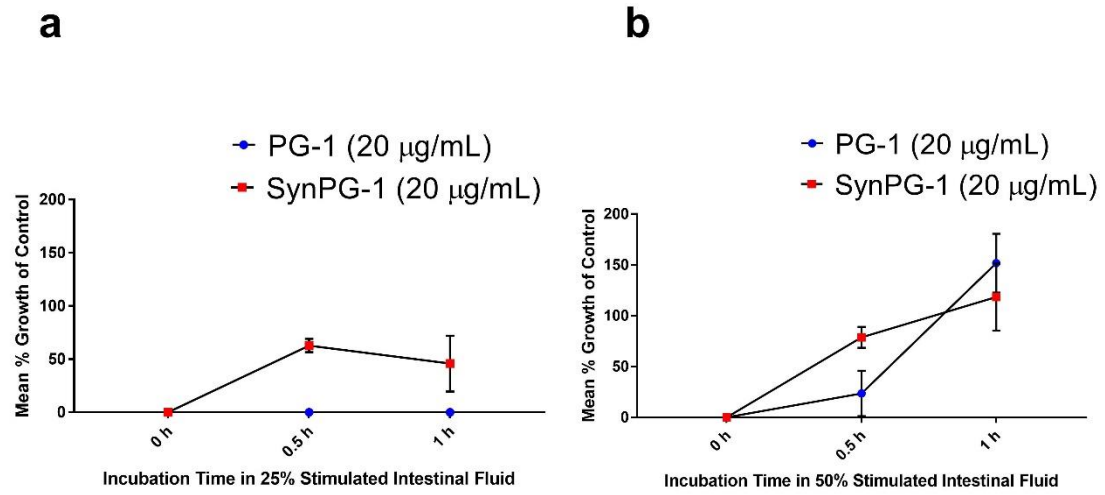

Figure S1. PG-1 and SynPG-1 stability in simulated intestinal fluid.

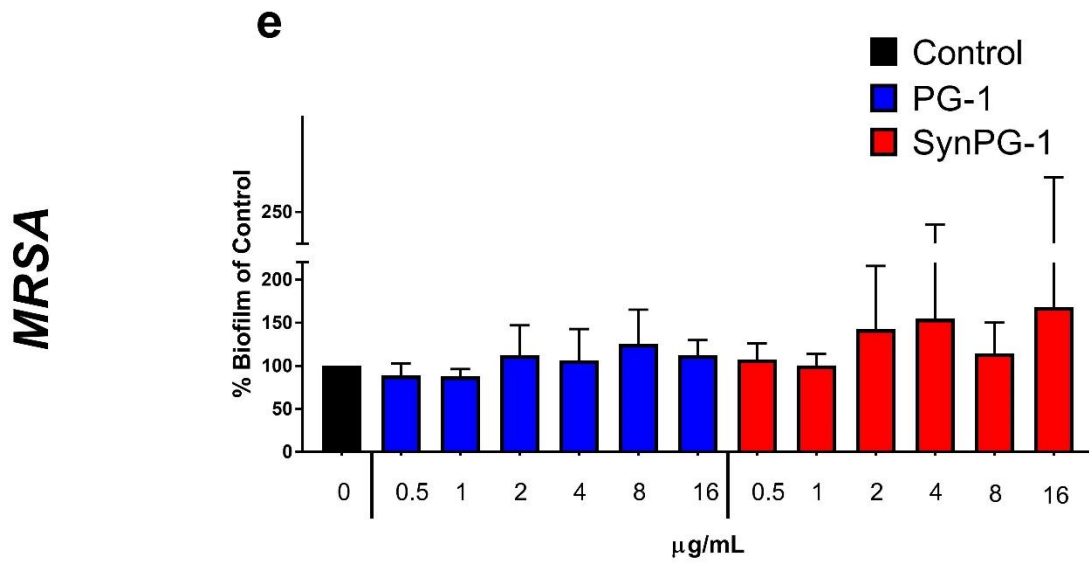

Figure S2. MRSA.
